# Supplementary material for: Late twentieth century increase in northern Spitsbergen (Svalbard) glacier-derived runoff tracked by coralline algal Ba/Ca ratios
Source: Springer Nature journal article supplement (doi:10.1007/s00382-021-05642-x), 2021-01-24
Supplement: MOESM1 [file 382_2021_5642_MOESM1_ESM.xlsx]

## Sheet: BaCa_from 1813
year	Sv1 Ba/Ca	Sv90 Ba/Ca	Sv18 Ba/Ca	Sv47 Ba/Ca	4-sample average Ba/Ca	Sv1 Ba/Ca_n	Sv90 Ba/Ca_n	Sv18 Ba/Ca_n	Sv47 Ba/Ca_n	4-sample average_n
1813	2.69914e-05
1814	3.43264e-05
1815	3.16884e-05
1816	3.35228e-05
1817	3.23302e-05
1818	3.0408e-05
1819	2.95596e-05
1820	3.16632e-05
1821	3.17492e-05
1822	3.15058e-05
1823	2.66417e-05
1824	2.77446e-05
1825	2.62958e-05
1826	2.72185e-05
1827	2.75787e-05
1828	2.7421e-05
1829	2.72766e-05
1830	2.67729e-05
1831	2.97134e-05
1832	2.49452e-05
1833	2.56512e-05
1834	2.81605e-05
1835	2.89955e-05
1836	2.81964e-05
1837	2.77233e-05
1838	2.6087e-05
1839	2.94902e-05
1840	2.95622e-05
1841	2.83144e-05
1842	2.60844e-05
1843	2.77368e-05
1844	2.72819e-05
1845	2.76344e-05
1846	2.7871e-05
1847	2.90106e-05
1848	2.3959e-05
1849	2.53932e-05
1850	2.91828e-05
1851	2.67112e-05
1852	2.70972e-05
1853	2.68874e-05
1854	2.87455e-05
1855	2.52103e-05
1856	2.94921e-05
1857	2.80101e-05
1858	2.73033e-05
1859	2.59247e-05
1860	2.77424e-05
1861	2.70689e-05
1862	2.82822e-05
1863	2.61433e-05
1864	2.57151e-05
1865	2.78832e-05
1866	2.71587e-05
1867	2.65134e-05
1868	2.6945e-05
1869	2.55052e-05
1870	2.70367e-05
1871	2.63146e-05
1872	2.67188e-05
1873	2.50279e-05
1874	2.53294e-05
1875	2.83139e-05
1876	2.79437e-05
1877	2.868e-05
1878	2.76161e-05
1879	2.75455e-05
1880	2.69718e-05
1881	2.71962e-05
1882	2.65517e-05
1883	2.45384e-05
1884	2.70012e-05
1885	2.58875e-05
1886	2.40765e-05
1887	2.60573e-05
1888	2.60733e-05
1889	2.77009e-05
1890	2.53275e-05
1891	2.63829e-05
1892	2.57532e-05
1893	2.70964e-05
1894	2.75262e-05
1895	2.41909e-05	3.00268e-05
1896	2.56825e-05	2.77258e-05
1897	2.52924e-05	2.89781e-05
1898	2.60916e-05	3.2313e-05
1899	2.23987e-05	2.84736e-05
1900	2.50427e-05	2.79382e-05		3.09455e-05
1901	2.61839e-05	2.5113e-05		2.93849e-05
1902	2.4127e-05	2.60197e-05		3.29501e-05
1903	2.48486e-05	2.70899e-05		3.03391e-05
1904	2.54631e-05	3.07767e-05		3.0061e-05
1905	2.53956e-05	2.71001e-05		3.3241e-05
1906	2.75341e-05	3.1269e-05		2.96482e-05
1907	2.48276e-05	2.88092e-05		2.6942e-05
1908	2.30429e-05	2.79135e-05		3.15805e-05
1909	2.42682e-05	2.92023e-05		2.6784e-05
1910	2.57728e-05	2.9723e-05		2.57395e-05
1911		2.75027e-05		2.91324e-05
1912		2.85175e-05		2.91906e-05
1913	2.82939e-05	2.69756e-05		2.60743e-05
1914	2.8071e-05	2.8862e-05		2.79311e-05
1915	2.59302e-05	2.74557e-05	3.39079e-05	2.7904e-05	2.87995e-05	-0.803086	-1.06166	-0.497519	-0.915687	-0.819488
1916	2.62496e-05	2.70488e-05	3.52764e-05	2.75296e-05	2.90261e-05	-0.719268	-1.14994	-0.234848	-1.00746	-0.777878
1917	2.56983e-05	2.73257e-05	3.38634e-05	3.02279e-05	2.92788e-05	-0.863963	-1.08988	-0.506056	-0.346097	-0.701499
1918	2.6422e-05	2.64968e-05	3.20865e-05	2.70835e-05	2.80222e-05	-0.674022	-1.26968	-0.847113	-1.11678	-0.976898
1919	2.61185e-05	2.59668e-05	3.23022e-05	2.96154e-05	2.85007e-05	-0.753685	-1.38465	-0.805724	-0.496215	-0.860069
1920	2.58638e-05	2.4785e-05	3.25069e-05	3.17527e-05	2.87271e-05	-0.820537	-1.64101	-0.766421	0.0276242	-0.800085
1921	2.64109e-05	2.58753e-05	3.26211e-05	2.8653e-05	2.83901e-05	-0.676926	-1.40449	-0.744509	-0.732101	-0.889506
1922	2.51813e-05	2.80501e-05	3.18083e-05	2.62903e-05	2.78325e-05	-0.999654	-0.932742	-0.900518	-1.3112	-1.03603
1923	2.62101e-05	2.79024e-05	3.23601e-05	2.57588e-05	2.80578e-05	-0.729641	-0.964775	-0.794613	-1.44147	-0.982624
1924	2.56748e-05	3.06239e-05	3.74843e-05	2.64634e-05	3.00616e-05	-0.870134	-0.374435	0.188926	-1.26878	-0.581106
1925	2.62395e-05	2.83114e-05	3.6998e-05	2.65701e-05	2.95297e-05	-0.721914	-0.876058	0.0955921	-1.24263	-0.686254
1926	2.40812e-05	3.08642e-05	4.23414e-05	3.13532e-05	3.216e-05	-1.2884	-0.322307	1.12118	-0.070283	-0.139953
1927	2.46229e-05	3.10149e-05	3.70886e-05	3.02687e-05	3.07487e-05	-1.14623	-0.289619	0.112968	-0.336099	-0.414745
1928	2.65302e-05	2.94931e-05	3.75782e-05	2.67843e-05	3.00965e-05	-0.645608	-0.619729	0.206956	-1.19012	-0.562126
1929	2.50177e-05	2.9599e-05	3.42299e-05	2.8145e-05	2.92479e-05	-1.04259	-0.596736	-0.435718	-0.856614	-0.732914
1930	2.44819e-05	2.92036e-05	3.35728e-05	3.1504e-05	2.96906e-05	-1.18323	-0.682523	-0.561834	-0.0333228	-0.615227
1931	2.64667e-05	2.89909e-05	3.71286e-05	3.3893e-05	3.16198e-05	-0.662274	-0.728662	0.120654	0.552206	-0.179519
1932	2.95511e-05	3.0395e-05	3.57374e-05	2.97896e-05	3.13683e-05	0.147277	-0.424074	-0.146372	-0.453519	-0.219172
1933	2.6511e-05	3.0125e-05	3.5318e-05	2.92846e-05	3.03096e-05	-0.650654	-0.482652	-0.226876	-0.577303	-0.484371
1934	2.47595e-05	2.83056e-05	3.62441e-05	2.80714e-05	2.93452e-05	-1.11036	-0.877305	-0.0491209	-0.874653	-0.72786
1935	2.83183e-05	2.93776e-05	3.91788e-05	2.75464e-05	3.11053e-05	-0.176304	-0.644779	0.514169	-1.00332	-0.327559
1936	2.6276e-05	3.02089e-05	3.50292e-05	3.31833e-05	3.11744e-05	-0.712337	-0.464445	-0.282296	0.378271	-0.270202
1937	2.66665e-05	2.8838e-05	3.76444e-05	3.35246e-05	3.16683e-05	-0.609855	-0.761831	0.219645	0.461912	-0.172532
1938	2.87977e-05	2.96876e-05	3.79839e-05	3.0323e-05	3.16981e-05	-0.0504609	-0.577531	0.284825	-0.322802	-0.166492
1939	2.69535e-05	2.99926e-05	3.61038e-05	2.75563e-05	3.01515e-05	-0.534509	-0.511368	-0.0760432	-1.00092	-0.530709
1940	2.90572e-05	2.90964e-05	3.35689e-05	2.86481e-05	3.00927e-05	0.0176472	-0.705761	-0.562582	-0.733318	-0.496004
1941	2.73611e-05	2.95711e-05	3.45836e-05	3.03187e-05	3.04586e-05	-0.427527	-0.602808	-0.367829	-0.323844	-0.430502
1942	2.94462e-05	2.8398e-05	3.15786e-05	2.9064e-05	2.96217e-05	0.11975	-0.857263	-0.944612	-0.631382	-0.578377
1943	3.04057e-05	3.01569e-05	3.52206e-05	2.86793e-05	3.11156e-05	0.371579	-0.475732	-0.245575	-0.725673	-0.26885
1944	3.05263e-05	2.90786e-05	2.95016e-05	2.95824e-05	2.96722e-05	0.403229	-0.709628	-1.34326	-0.504308	-0.538491
1945	2.76416e-05	2.83382e-05	3.04385e-05	2.9446e-05	2.89661e-05	-0.353918	-0.870234	-1.16343	-0.537742	-0.731332
1946	2.81725e-05	3.35341e-05	3.22792e-05	2.97492e-05	3.09337e-05	-0.214569	0.25685	-0.810131	-0.463435	-0.307822
1947	2.90985e-05	3.30779e-05	3.27891e-05	2.91674e-05	3.10332e-05	0.0284709	0.157894	-0.712267	-0.606031	-0.282983
1948	2.7054e-05	2.86958e-05	3.74116e-05	3.19166e-05	3.12695e-05	-0.508142	-0.792663	0.174968	0.0677904	-0.264512
1949	2.72721e-05	2.79465e-05	3.17792e-05	3.3053e-05	3.00127e-05	-0.450891	-0.955207	-0.906104	0.346333	-0.491467
1950	2.70181e-05	3.10721e-05	3.43161e-05	3.5211e-05	3.19043e-05	-0.517569	-0.277207	-0.419179	0.875252	-0.0846757
1951	2.81237e-05	2.91053e-05	3.28261e-05	2.65664e-05	2.91554e-05	-0.227366	-0.70384	-0.705171	-1.24353	-0.719976
1952	2.63613e-05	2.9318e-05	3.28554e-05	2.78702e-05	2.91012e-05	-0.68996	-0.657696	-0.699535	-0.92397	-0.74279
1953	2.66809e-05	3.31812e-05	3.06515e-05	3.05425e-05	3.0264e-05	-0.60607	0.180297	-1.12256	-0.268987	-0.454329
1954	2.56794e-05	3.29971e-05	3.2906e-05	2.91499e-05	3.01831e-05	-0.86893	0.14036	-0.689831	-0.610313	-0.507178
1955	2.81099e-05	3.16572e-05	3.06237e-05	2.82964e-05	2.96718e-05	-0.230986	-0.150277	-1.12789	-0.819502	-0.582164
1956	3.05573e-05	2.92336e-05	3.38292e-05	2.89652e-05	3.06464e-05	0.411377	-0.676005	-0.512624	-0.655583	-0.358209
1957	2.91463e-05	2.97505e-05	3.24309e-05	2.95072e-05	3.02087e-05	0.0410251	-0.563882	-0.781011	-0.522738	-0.456651
1958	2.70212e-05	2.90344e-05	3.03892e-05	2.87675e-05	2.88031e-05	-0.516754	-0.719211	-1.1729	-0.704055	-0.77823
1959	2.83003e-05	3.05528e-05	3.2029e-05	2.96377e-05	3.013e-05	-0.181032	-0.389841	-0.858149	-0.490754	-0.479944
1960	2.56549e-05	3.54395e-05	3.36131e-05	3.00111e-05	3.11796e-05	-0.875365	0.670179	-0.5541	-0.399246	-0.289633
1961	2.59418e-05	3.24968e-05	3.36757e-05	2.69833e-05	2.97744e-05	-0.80004	0.0318458	-0.542099	-1.14134	-0.612908
1962	2.78952e-05	3.41688e-05	3.5349e-05	3.3139e-05	3.2638e-05	-0.287343	0.394523	-0.22093	0.367399	0.0634122
1963	2.63138e-05	3.33022e-05	3.14878e-05	2.87848e-05	2.99721e-05	-0.702424	0.206555	-0.962034	-0.699809	-0.539428
1964	2.8543e-05	3.13433e-05	3.19931e-05	2.9884e-05	3.04408e-05	-0.117328	-0.218372	-0.865047	-0.430393	-0.407785
1965	2.62437e-05	3.0151e-05	2.99839e-05	2.99871e-05	2.90914e-05	-0.720819	-0.477001	-1.25068	-0.405114	-0.713405
1966	2.86136e-05	3.32339e-05	3.48862e-05	2.91619e-05	3.14739e-05	-0.0987949	0.191733	-0.309757	-0.607372	-0.206048
1967	2.7657e-05	3.19665e-05	3.68875e-05	3.21227e-05	3.21584e-05	-0.34986	-0.0831931	0.0743772	0.1183	-0.0600939
1968	2.81557e-05	2.89589e-05	3.29807e-05	3.04269e-05	3.01305e-05	-0.218979	-0.7356	-0.675484	-0.297336	-0.48185
1969	2.7318e-05	3.16518e-05	3.5018e-05	2.89734e-05	3.07403e-05	-0.438839	-0.15146	-0.284457	-0.653573	-0.382082
1970	2.50299e-05	3.27497e-05	3.91594e-05	2.93215e-05	3.15651e-05	-1.03939	0.0866958	0.510441	-0.568255	-0.252627
1971	2.60042e-05	3.1219e-05	3.30678e-05	2.86362e-05	2.97318e-05	-0.783679	-0.245334	-0.658764	-0.736217	-0.605998
1972	2.64879e-05	3.29892e-05	3.73206e-05	3.4063e-05	3.27152e-05	-0.65671	0.138651	0.15751	0.593868	0.0583297
1973	2.85757e-05	3.26679e-05	3.5723e-05	3.11901e-05	3.20391e-05	-0.108749	0.0689557	-0.149144	-0.110273	-0.0748028
1974	2.83328e-05	3.05937e-05	3.43656e-05	3.09808e-05	3.10682e-05	-0.172506	-0.380982	-0.409668	-0.16158	-0.281184
1975	2.70841e-05	3.20902e-05	3.51467e-05	2.97791e-05	3.1025e-05	-0.500248	-0.0563486	-0.259748	-0.456104	-0.318112
1976	2.71333e-05	3.03635e-05	3.37668e-05	3.11919e-05	3.06139e-05	-0.487329	-0.430908	-0.524609	-0.109834	-0.38817
1977	2.46542e-05	3.47608e-05	3.35538e-05	2.93805e-05	3.05873e-05	-1.13801	0.522941	-0.565483	-0.553803	-0.433589
1978	2.8989e-05	3.14931e-05	3.46579e-05	2.81554e-05	3.08238e-05	-0.00026766	-0.185883	-0.353567	-0.85407	-0.348447
1979	2.52803e-05	3.03913e-05	3.53297e-05	2.92254e-05	3.00567e-05	-0.973682	-0.424878	-0.224635	-0.591823	-0.553754
1980	2.75269e-05	3.30961e-05	4.21461e-05	3.07547e-05	3.3381e-05	-0.384009	0.161847	1.08371	-0.216985	0.161141
1981	2.54998e-05	3.3824e-05	4.05877e-05	2.69e-05	3.17029e-05	-0.916058	0.319738	0.784594	-1.16177	-0.243374
1982	2.70576e-05	3.16208e-05	3.73043e-05	2.95907e-05	3.13933e-05	-0.50719	-0.158187	0.154372	-0.502288	-0.253323
1983	2.70946e-05	3.05754e-05	3.80004e-05	3.15286e-05	3.17997e-05	-0.497484	-0.384947	0.287976	-0.027305	-0.15544
1984	2.67999e-05	3.32583e-05	3.82998e-05	2.96703e-05	3.20071e-05	-0.574822	0.197038	0.345451	-0.48278	-0.128778
1985	2.55725e-05	3.32533e-05	3.60242e-05	3.38182e-05	3.21671e-05	-0.896988	0.195954	-0.0913253	0.533873	-0.0646217
1986	2.73793e-05	2.95258e-05	3.43793e-05	2.9557e-05	3.02103e-05	-0.422753	-0.612628	-0.40705	-0.510541	-0.488243
1987	2.97204e-05	2.78594e-05	2.94392e-05	3.25995e-05	2.99046e-05	0.191695	-0.974092	-1.35525	0.235171	-0.475618
1988	3.42762e-05	3.23521e-05	3.13317e-05	3.15611e-05	3.23803e-05	1.38746	0.000462188	-0.992006	-0.0193456	0.0941432
1989	2.93456e-05	3.27275e-05	3.44311e-05	3.2793e-05	3.23243e-05	0.0933278	0.0818809	-0.3971	0.282594	0.0151757
1990	2.7784e-05	3.32168e-05	3.26738e-05	3.41565e-05	3.19578e-05	-0.316533	0.188016	-0.734398	0.616786	-0.061532
1991	2.62979e-05	3.35593e-05	3.38771e-05	3.48584e-05	3.21482e-05	-0.706576	0.262323	-0.503439	0.788817	-0.0397188
1992	3.2131e-05	3.30316e-05	3.99915e-05	3.16698e-05	3.4206e-05	0.824407	0.147858	0.670149	0.00730245	0.412429
1993	3.06738e-05	3.60959e-05	3.59963e-05	2.96767e-05	3.31107e-05	0.441952	0.812569	-0.0966747	-0.481192	0.169164
1994	3.02205e-05	3.56151e-05	3.86368e-05	3.21947e-05	3.41668e-05	0.322966	0.70827	0.410136	0.135954	0.394332
1995	3.06025e-05	3.18722e-05	3.84859e-05	3.8298e-05	3.48147e-05	0.42324	-0.103647	0.381174	1.63187	0.58316
1996	3.59982e-05	2.93112e-05	3.47925e-05	3.88636e-05	3.47414e-05	1.83943	-0.659173	-0.327742	1.77048	0.655748
1997	3.1868e-05	3.46236e-05	3.41902e-05	3.85967e-05	3.48196e-05	0.75537	0.493194	-0.443336	1.70508	0.627578
1998	3.31596e-05	3.52906e-05	3.45788e-05	3.4123e-05	3.4288e-05	1.09437	0.637878	-0.368747	0.608571	0.493018
1999	3.80101e-05	3.72842e-05	4.00827e-05	3.41503e-05	3.73818e-05	2.36749	1.07032	0.687652	0.615267	1.18518
2000	3.52001e-05	3.4464e-05	3.83648e-05	3.47954e-05	3.57061e-05	1.62995	0.458568	0.35793	0.773379	0.804958
2001	3.30343e-05	3.36176e-05	4.1311e-05	3.1691e-05	3.49135e-05	1.06149	0.274973	0.923422	0.0124928	0.568094
2002	3.35775e-05	3.2497e-05	4.29592e-05	3.595e-05	3.62459e-05	1.20406	0.0318853	1.23977	1.05637	0.883019
2003	3.77417e-05	3.64384e-05	4.4218e-05	3.79842e-05	3.90956e-05	2.29704	0.886851	1.48137	1.55494	1.55505
2004	3.49105e-05	3.67455e-05	3.90963e-05	3.83673e-05	3.72799e-05	1.55393	0.953461	0.498322	1.64885	1.16364
2005	3.62487e-05	3.78414e-05	4.62047e-05	3.6604e-05	3.92247e-05	1.90517	1.19119	1.8627	1.21667	1.54394
2006	3.54688e-05	3.94793e-05	4.40118e-05	3.52009e-05	3.85402e-05	1.70047	1.54649	1.44181	0.872771	1.39038
2007	3.35812e-05	4.25305e-05	4.3018e-05	3.66473e-05	3.89443e-05	1.20505	2.20835	1.25105	1.22729	1.47293
2008	3.2388e-05	4.33471e-05	4.81936e-05	3.75447e-05	4.03684e-05	0.891859	2.3855	2.24445	1.44724	1.74226
2009	3.62068e-05	4.58209e-05	5.12155e-05	4.39939e-05	4.43093e-05	1.89418	2.9221	2.82448	3.02791	2.66717
2010	3.54735e-05	4.25492e-05	4.24867e-05	4.18966e-05	4.06015e-05	1.70172	2.2124	1.14908	2.51388	1.89427
2011	3.83373e-05	4.5465e-05	4.84718e-05	4.20276e-05	4.35754e-05	2.45336	2.84489	2.29784	2.54598	2.53552
2012	3.85632e-05	3.96041e-05	5.22779e-05	4.1497e-05	4.29855e-05	2.51266	1.57356	3.02838	2.41592	2.38263
2013	3.81462e-05	4.59914e-05	4.73043e-05	4.19276e-05	4.33424e-05	2.40321	2.95908	2.07376	2.52147	2.48938
2014	3.7036e-05	4.46137e-05	5.53905e-05	3.97232e-05	4.41909e-05	2.11182	2.66025	3.62583	1.98117	2.59477
2015	3.72531e-05	4.63918e-05	5.05506e-05	3.98515e-05	4.35117e-05	2.16878	3.04594	2.69685	2.01262	2.48105
